# Supplementary material for: Hydrogenation properties of lithium and sodium hydride – closo-borate, [B10H10]2− and [B12H12]2−, composites
Source: Royal Society of Chemistry journal article supplement (doi:10.1039/c7cp07776a), 2018-01-01
Supplement: c7cp07776a1.pdf [file c7cp07776a1.pdf]

## Supporting Information

Hydrogenation Properties of Lithium and Sodium Hydride – *closo*-borate,

$[\text{B}_{10}\text{H}_{10}]^{2-}$  and  $[\text{B}_{12}\text{H}_{12}]^{2-}$ , Composites

Steffen R. H. Jensen,<sup>a</sup> Mark Paskevicius,<sup>a</sup> Bjarne R. S. Hansen,<sup>a</sup> Anders S. Jakobsen,<sup>a</sup>  
Kasper T. Møller,<sup>a</sup> James L. White,<sup>c</sup> Mark D. Allendorf,<sup>c</sup> Vitalie Stavila,<sup>c\*</sup> Jørgen Skibsted,<sup>b</sup> and  
Torben R. Jensen<sup>a\*</sup>

<sup>a</sup> Center for Materials Crystallography, Interdisciplinary Nanoscience Center (iNANO) and  
Department of Chemistry, Aarhus University, Langelandsgade 140, 8000 Aarhus C, Denmark

<sup>b</sup> Department of Chemistry and Interdisciplinary Nanoscience Center (iNANO), Aarhus  
University Langelandsgade 140, 8000 Aarhus C, Denmark

<sup>c</sup> Chemistry, Combustion, and Materials Center, Sandia National Laboratories, Livermore,  
California 94551, United States

\* Corresponding authors

Torben R. Jensen ([trj@chem.au.dk](mailto:trj@chem.au.dk)) and Vitalie Stavila ([vnstavi@sandia.gov](mailto:vnstavi@sandia.gov)).

**Table S1.** Observed PXD reflections for the unidentified compound **1** ( $\lambda = 1.54056 \text{ \AA}$ ).

|          |                    |       |       |       |       |       |       |       |       |
|----------|--------------------|-------|-------|-------|-------|-------|-------|-------|-------|
| <b>1</b> | $2\theta / ^\circ$ | 14.16 | 14.58 | 15.18 | 15.51 | 16.52 | 16.84 | 19.24 | 19.36 |
|          | $d / \text{\AA}$   | 6.25  | 6.07  | 5.83  | 5.71  | 5.36  | 5.26  | 4.61  | 4.58  |
|          | Int / %            | 62    | 49    | 64    | 34    | 64    | 100   | 27    | 27    |

---

**Table S2.** Observed PXD reflections for the unidentified compound **2** ( $\lambda = 1.54056 \text{ \AA}$ ).

|          |                    |       |       |       |       |       |       |
|----------|--------------------|-------|-------|-------|-------|-------|-------|
| <b>2</b> | $2\theta / ^\circ$ | 5.37  | 6.15  | 6.57  | 13.93 | 15.34 | 15.93 |
|          | $d / \text{\AA}$   | 16.44 | 14.37 | 13.45 | 6.35  | 5.77  | 5.56  |
|          | Int / %            | 100   | 60    | 49    | 25    | 46    | 31    |

---

**Table S3.** Observed reflections of the unidentified compounds **3** and **4** ( $\lambda = 1.54056 \text{ \AA}$ ).

|          |                    |       |       |       |       |       |       |       |       |
|----------|--------------------|-------|-------|-------|-------|-------|-------|-------|-------|
| <b>3</b> | $2\theta / ^\circ$ | 12.28 | 13.63 | 14.11 | 14.41 | 18.39 | 18.99 | 22.49 | 26.42 |
|          | $d / \text{\AA}$   | 7.20  | 6.49  | 6.27  | 6.14  | 4.82  | 4.67  | 3.95  | 3.37  |
|          | Int / %            | 26    | 19    | 28    | 62    | 47    | 100   | 14    | 26    |
| <b>4</b> | $2\theta / ^\circ$ | 11.98 | 13.98 | 14.63 | 18.47 | 21.93 | 28.21 | 30.69 |       |
|          | $d / \text{\AA}$   | 7.38  | 6.33  | 6.05  | 4.80  | 4.05  | 3.16  | 2.91  |       |
|          | Int / %            | 45    | 67    | 37    | 100   | 31    | 33    | 43    |       |

---

**Table S4.**  $^{11}\text{B}$  NMR data for relevant *closo*-, *nido*-, *arachno*- and *hypho*-borates

| BORATES                             | TYPES OF B      | $\delta(^{11}\text{B})$                        | MULTIPLICITY                                          | $J_{\text{BH}}$              | B ATOM CHARGE  | REFERENCE |
|-------------------------------------|-----------------|------------------------------------------------|-------------------------------------------------------|------------------------------|----------------|-----------|
| <b>CLOSO-BORATES</b>                |                 |                                                |                                                       |                              |                |           |
| $[\text{B}_6\text{H}_6]^{2-}$       | 1               | -13.6                                          | Doublet                                               | 122                          | -0.11          | 1         |
| $[\text{B}_7\text{H}_7]^{2-}$       | 2 (5:2 ratio)   | -0.2<br>-22.6                                  | Doublet<br>Doublet                                    | 119                          | -0.11          | 2         |
| $[\text{B}_8\text{H}_8]^{2-}$       | 3 (1:2:1 ratio) | 9.5<br>-3.6<br>-22.2                           | Doublet<br>Doublet<br>Doublet                         | n/a                          | n/a            | 3         |
| $[\text{B}_9\text{H}_9]^{2-}$       | 2 (1:2 ratio)   | -2.9<br>-20.5                                  | Doublet<br>Doublet                                    | 135<br>120                   | -0.10<br>-0.01 | 4         |
| $[\text{B}_{10}\text{H}_{10}]^{2-}$ | 2 (1:4 ratio)   | 0.89<br>-30.85                                 | Doublet<br>Doublet                                    | 141<br>124                   | -0.08<br>-0.03 | 5         |
| $[\text{B}_{10}\text{H}_{11}]^-$    | 3 (1:5:4 ratio) | 26.1<br>-21.5<br>-24.8                         | Doublet<br>Doublet<br>Doublet                         | ?<br>?<br>?                  | n/a            | 6         |
| $[\text{B}_{11}\text{H}_{11}]^{2-}$ | 1               | -16.95                                         | Doublet                                               | 130                          | n/a            | 7         |
| $[\text{B}_{12}\text{H}_{12}]^{2-}$ | 1               | -15.63                                         | Doublet                                               | 124                          | -0.02          | 8         |
| <b>NIDO-BORATES</b>                 |                 |                                                |                                                       |                              |                |           |
| $[\text{B}_5\text{H}_8]^-$          | 2 (4:1 ratio)   | -13.6<br>-53.1                                 | n/a                                                   | 164<br>175                   | n/a            | 9         |
| $[\text{B}_9\text{H}_{12}]^-$       | 6 (3:2:1:2:1)   | -10.47<br>-14.74<br>-16.24<br>-35.00<br>-52.74 | Doublet<br>Doublet<br>Doublet<br>Doublet<br>Doublet   | 137<br>175<br>148<br>153     | n/a            | 10        |
| $[\text{B}_{10}\text{H}_{13}]^-$    | 4 (2:1:5:2)     | 6.8<br>2.5<br>-5.0<br>-35.20                   | Doublet<br>Doublet<br>Doublet<br>Doublet              | 140<br>135<br>135<br>150     | n/a            | 11        |
| $[\text{B}_{10}\text{H}_{12}]^-$    | 5 (1:2:5:1:1)   | -1.44<br>-6.65<br>-25.9<br>-36.20<br>-40.60    | Doublet<br>Doublet<br>Multiplet<br>Doublet<br>Doublet | 162<br>132<br><br>134<br>132 | n/a            | 12        |

**Table S4 (continued).**  $^{11}\text{B}$  NMR data for relevant *closo*-, *nido*-, *arachno*- and *hypho*-borates

| BORATES                             | TYPES OF B  | $\delta(^{11}\text{B})$ | MULTIPLICITY | $J_{\text{BH}}$ | B ATOM CHARGE | REFERENCE |
|-------------------------------------|-------------|-------------------------|--------------|-----------------|---------------|-----------|
| <b>ARACHNO-BORATES</b>              |             |                         |              |                 |               |           |
| $[\text{B}_9\text{H}_{14}]^-$       | 3 (1:1:1)   | -6.8                    | n/a          | 137             | n/a           | 13        |
|                                     |             | -19.2                   |              | 136             |               |           |
|                                     |             | -22.4                   |              | 138             |               |           |
| $[\text{B}_9\text{H}_{13}]^{2-}$    | 3 (1:1:1)   | -4.55                   | Doublet      | 122             | n/a           | 14        |
|                                     |             | -24.90                  | Doublet      | 125             |               |           |
|                                     |             | -29.00                  | Doublet      | 104             |               |           |
| $[\text{B}_{10}\text{H}_{14}]^{2-}$ | 4 (1:2:1:1) | -8.09                   | Doublet      | 124             | n/a           | 15, 16    |
|                                     |             | -23.10                  | Doublet      | 130             |               |           |
|                                     |             | -36.62                  | Triplet      | 103             |               |           |
|                                     |             | -42.26                  | Doublet      | 129             |               |           |
| <b>HYPHO-BORATES</b>                |             |                         |              |                 |               |           |
| $[\text{B}_5\text{H}_{12}]^-$       | 2 (4:1)     | -15.9                   | n/a          | n/a             | n/a           | 17        |
|                                     |             | -57.6                   |              |                 |               |           |

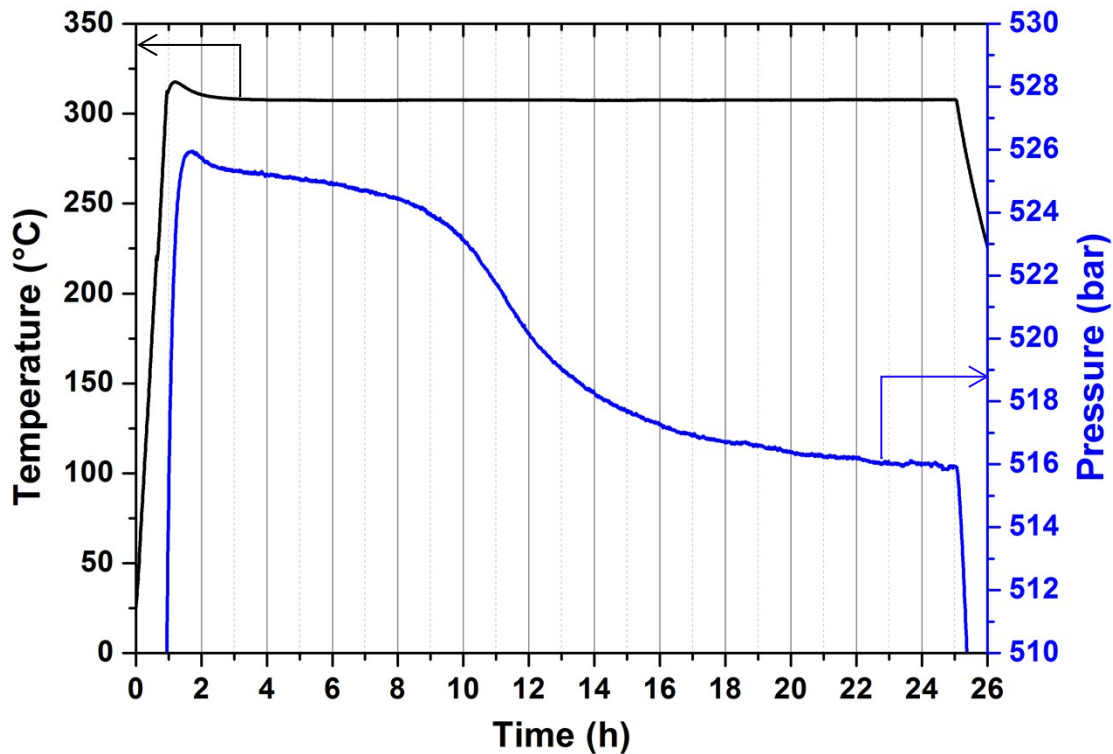

**Figure S1.** High-pressure hydrogen absorption experiment of  $\text{Li}_2\text{B}_{10}\text{H}_{10}-8 \text{LiH}$  ( $\text{Li}_2\text{B}_{10}\text{-A}$ ) carried out by heating from  $RT$  to  $307 \text{ }^\circ\text{C}$  ( $\Delta T/\Delta t = 5 \text{ }^\circ\text{C}/\text{min}$ ) and isothermal for 24 hours (black line) under  $p(\text{H}_2) = 526 \text{ bar}$  (blue line).

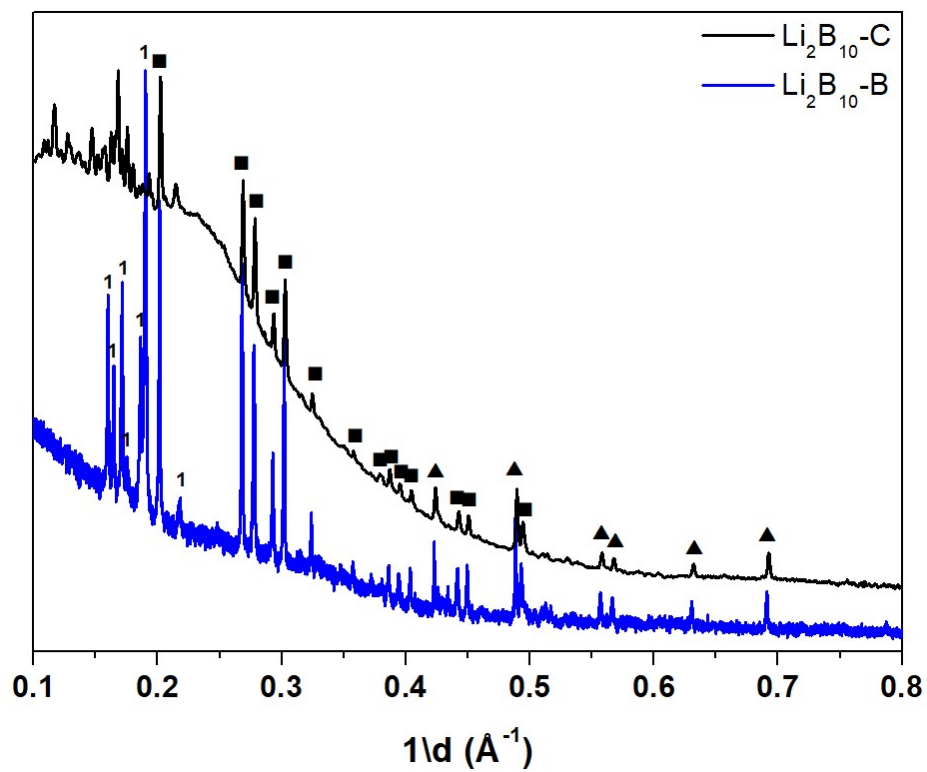

**Figure S2.** Powder X-ray diffraction patterns of  $\text{Li}_2\text{B}_{10}\text{-B}$  (bottom blue) and  $\text{Li}_2\text{B}_{10}\text{-C}$  (top black).  $\text{Li}_2\text{B}_{10}\text{-B}$  measured with  $\lambda = 1.5418 \text{ \AA}$  and  $\text{Li}_2\text{B}_{10}\text{-C}$  measured with  $\lambda = 0.20775 \text{ \AA}$ . Symbols:  $\blacksquare$  *o*- $\text{LiBH}_4$ ,  $\bullet$   $\text{Li}_2\text{B}_{10}\text{H}_{10}$ ,  $\blacktriangle$   $\text{LiH}$ , and compound **1**.

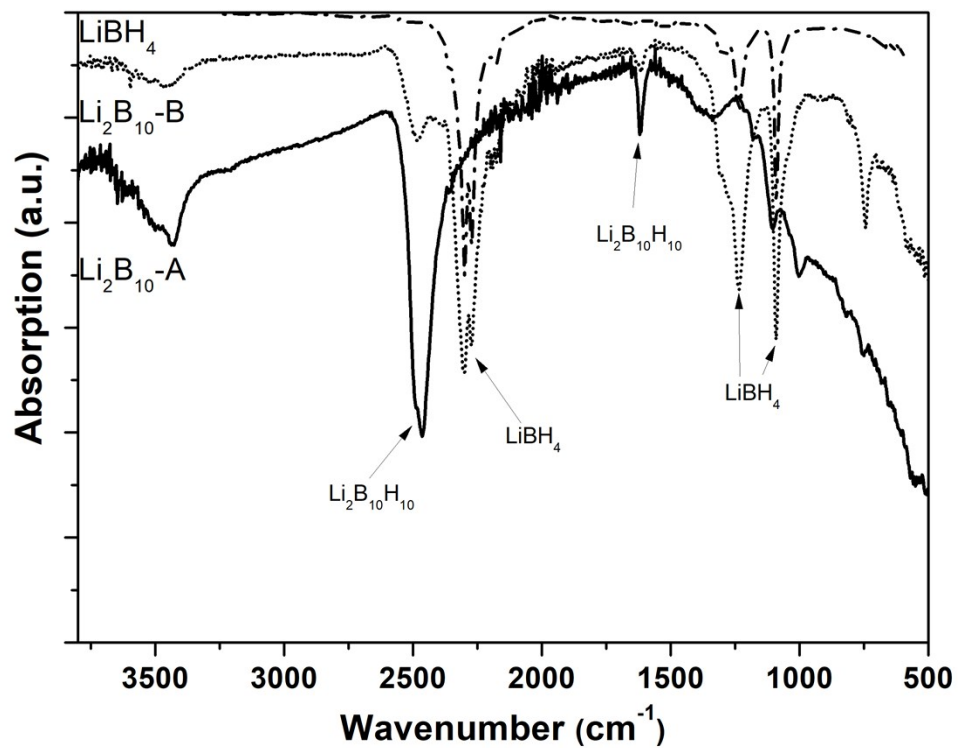

**Figure S3.** FT-IR spectra of Li<sub>2</sub>B<sub>10</sub>-A (solid black line), Li<sub>2</sub>B<sub>10</sub>-B (dotted grey line), and pure LiBH<sub>4</sub>, (dashed line).

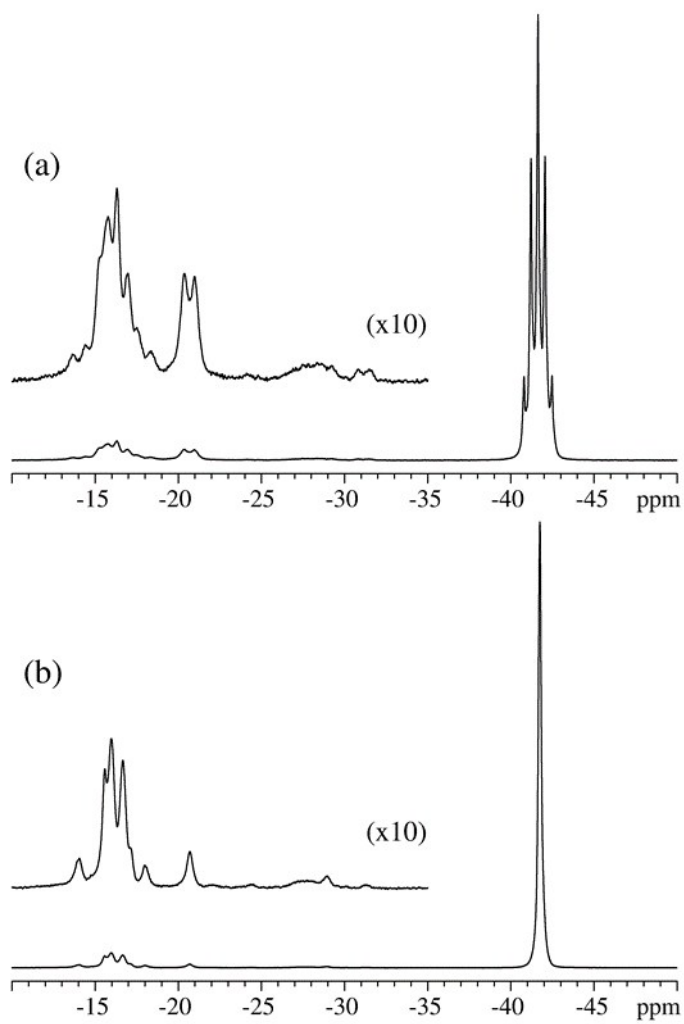

**Figure S4.** Solution  $^{11}\text{B}$  NMR spectra (14.1 T) of  $\text{Li}_2\text{B}_{10}\text{-B}$  dissolved in THF obtained (a) without and (b) with  $^1\text{H}$  decoupling.



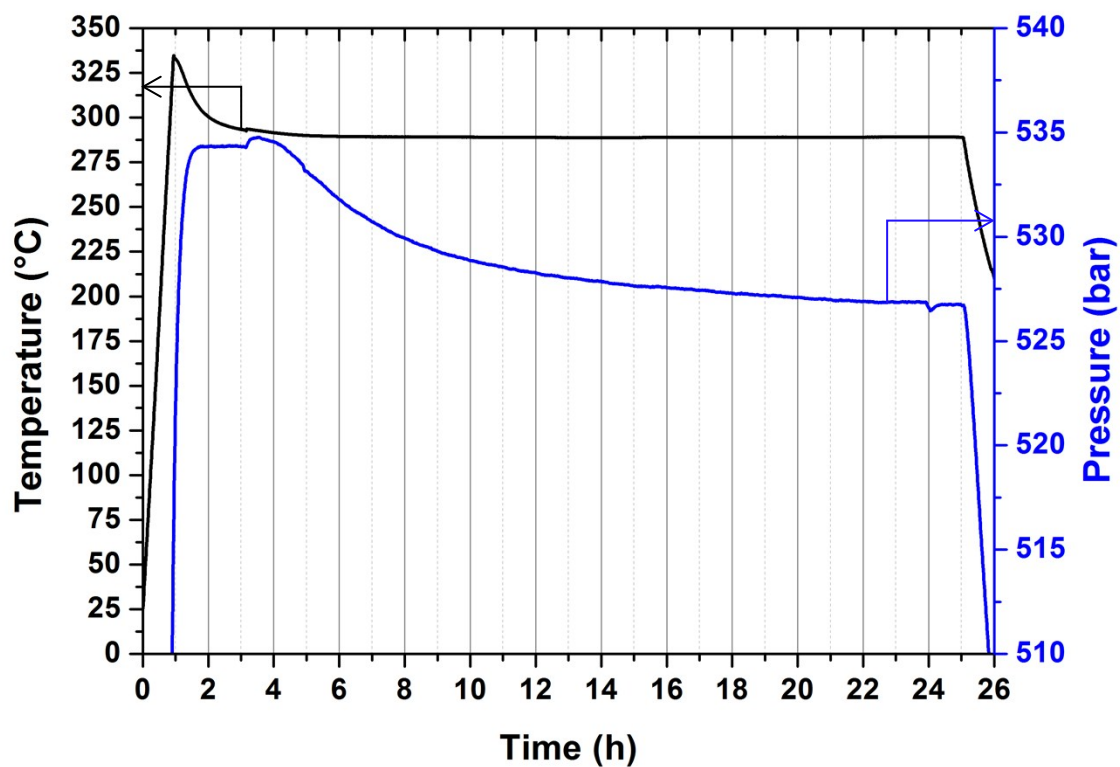

**Figure S5.** High-pressure hydrogen absorption experiment of  $\text{Na}_2\text{B}_{10}\text{H}_{10-8}\text{NaH}$  ( $\text{Na}_2\text{B}_{10}\text{-A}$ ) carried out by heating from  $RT$  to  $300\text{ }^\circ\text{C}$  ( $\Delta T/\Delta t = 5\text{ }^\circ\text{C}/\text{min}$ ) and isothermal for 24 hours (black line) under  $p(\text{H}_2) = 534\text{ bar}$  (blue line).

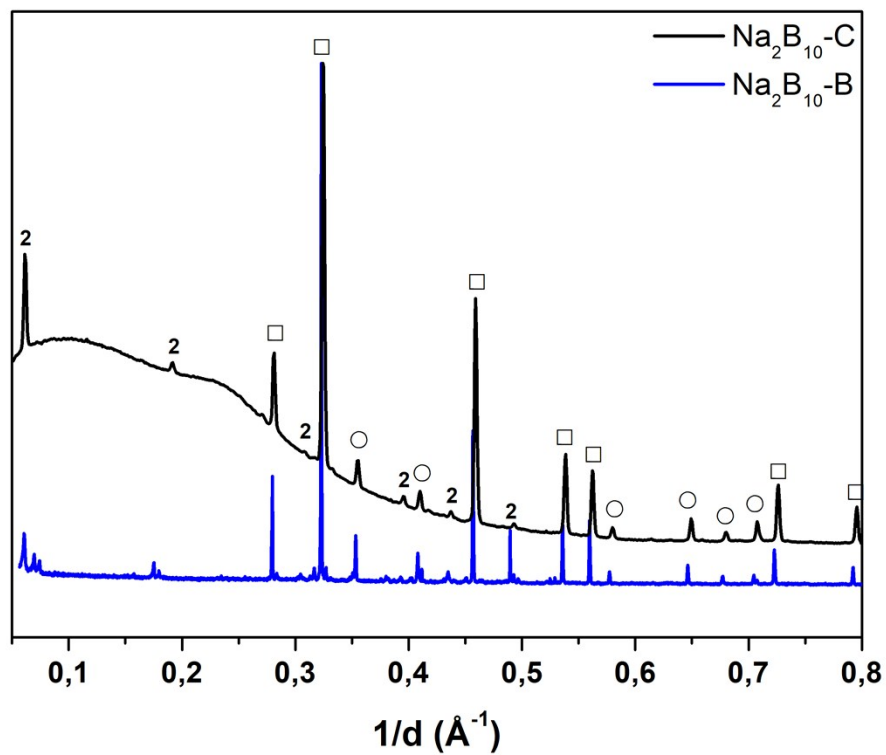

**Figure S6.** Powder X-ray diffraction patterns of  $\text{Na}_2\text{B}_{10}\text{-B}$  (blue) and  $\text{Na}_2\text{B}_{10}\text{-C}$  (black).  $\text{Na}_2\text{B}_{10}\text{-B}$  measured with  $\lambda = 1.5418 \text{ \AA}$  and  $\text{Na}_2\text{B}_{10}\text{-C}$  measured with  $\lambda = 0.20775 \text{ \AA}$ . Symbols:  $\square$   $\text{NaBH}_4$ ,  $\circ$   $\text{NaH}$ ,  $\triangle$   $\text{LT-Na}_2\text{B}_{10}\text{H}_{10}$  and compound **2**.

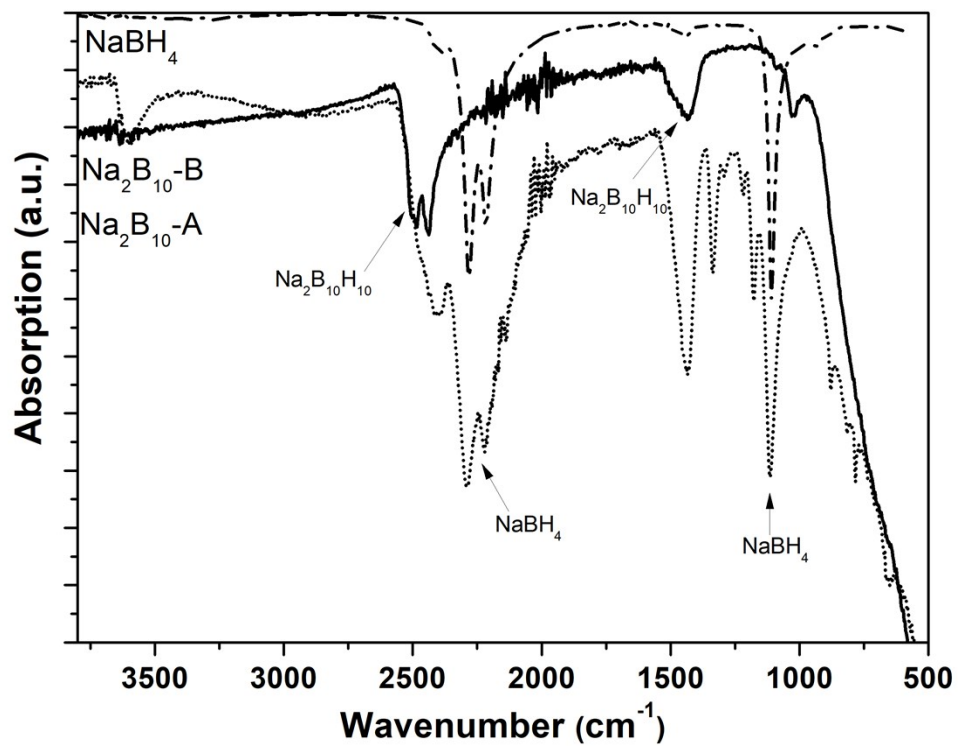

**Figure S7.** FT-IR spectra of Na<sub>2</sub>B<sub>10</sub>-A (solid black line), Na<sub>2</sub>B<sub>10</sub>-B (dotted line), and pure NaBH<sub>4</sub> (dashed line).

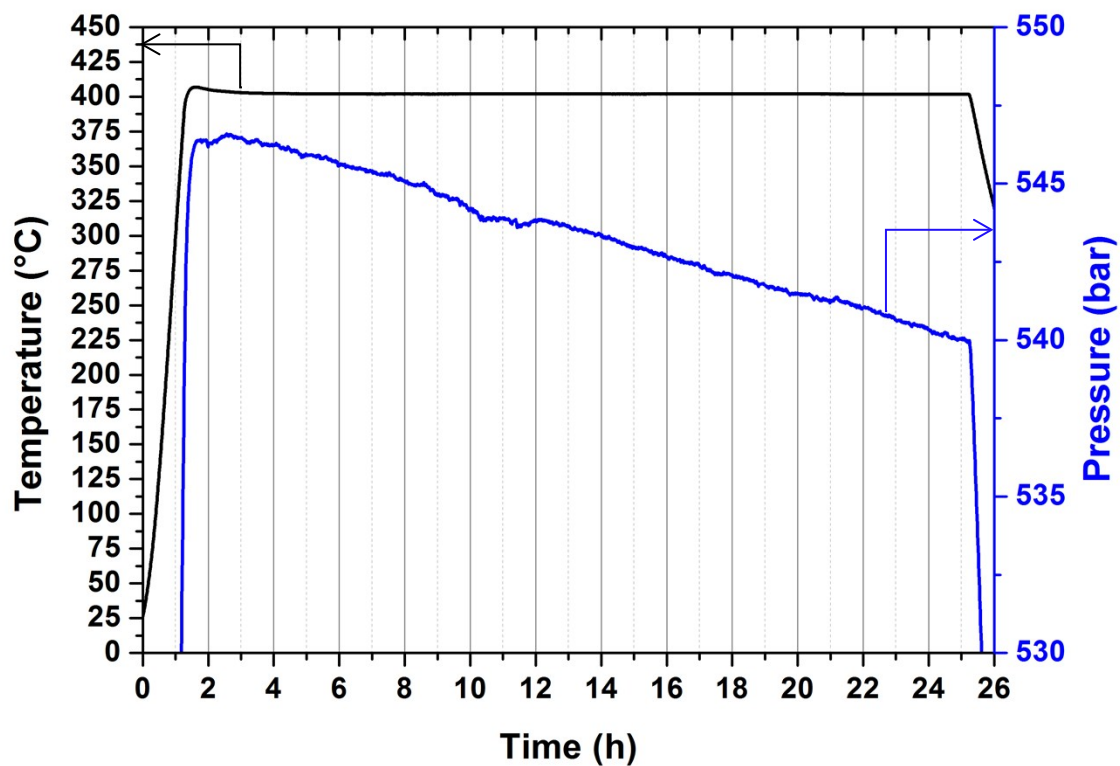

**Figure S8.** High-pressure hydrogen absorption experiment of  $\text{Li}_2\text{B}_{12}\text{H}_{12}-10 \text{ LiH}$  ( $\text{Li}_2\text{B}_{12}\text{-A}$ ) carried out by heating from  $RT$  to  $400 \text{ }^\circ\text{C}$  ( $\Delta T/\Delta t = 5 \text{ }^\circ\text{C}/\text{min}$ ) and isothermal for 24 hours (black line) under  $p(\text{H}_2) = 546 \text{ bar}$  (blue line).

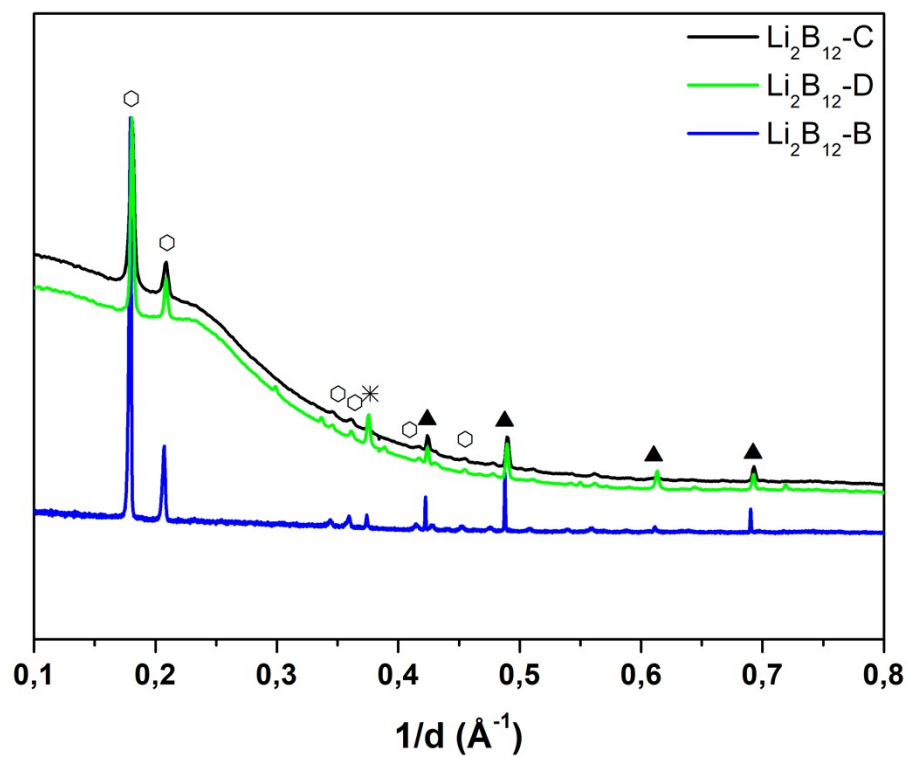

**Figure S9.** Powder X-ray diffraction patterns of  $\text{Li}_2\text{B}_{12}\text{-B}$  (bottom blue),  $\text{Li}_2\text{B}_{12}\text{-D}$  (middle green) and  $\text{Li}_2\text{B}_{12}\text{-C}$  (top black).  $\text{Li}_2\text{B}_{12}\text{-B}$  measured with  $\lambda = 1.5418 \text{ \AA}$ ,  $\text{Li}_2\text{B}_{12}\text{-C}$  and  $\text{Li}_2\text{B}_{12}\text{-D}$  measured with  $\lambda = 0.20775 \text{ \AA}$ . LT- $\text{Li}_2\text{B}_{12}\text{H}_{12}$ , ■ LiH, and \*  $\text{Li}_2\text{O}$ .

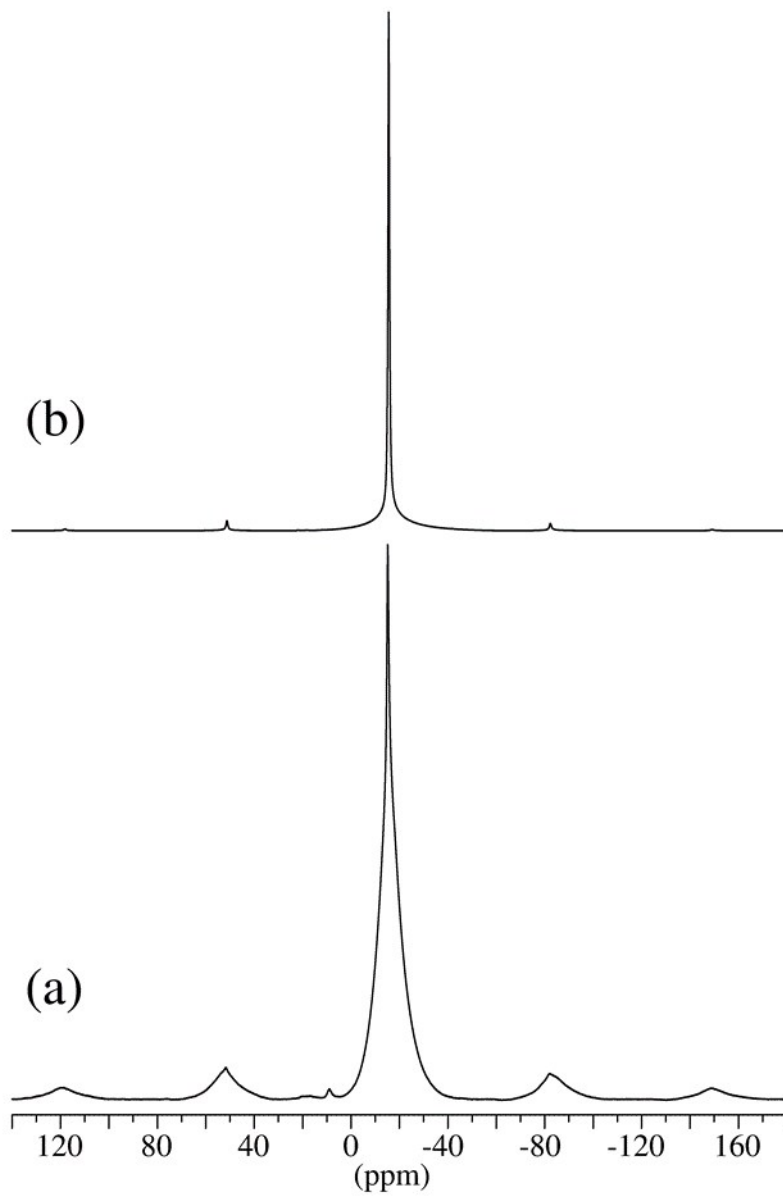

**Figure S10.**  $^{11}\text{B}$  MAS NMR spectra (16.45 T,  $\nu_{\text{R}} = 15.0$  kHz) of the hydrogenated composites (a)  $\text{Li}_2\text{B}_{12}\text{-B}$  and (b)  $\text{Na}_2\text{B}_{12}\text{-B}$ , exhibiting centerband resonances at -15.2 ppm and -15.7 ppm, respectively.

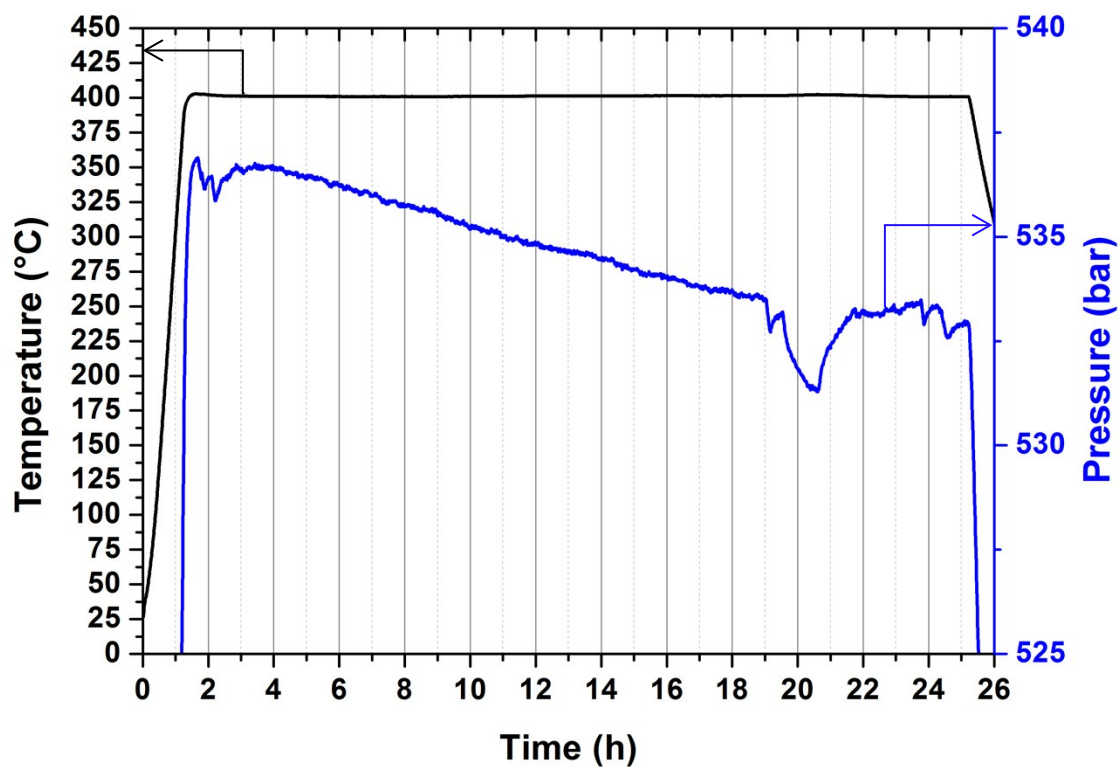

**Figure S11.** High-pressure hydrogen absorption experiment of  $\text{Na}_2\text{B}_{12}\text{H}_{12}\text{-10 NaH}$  ( $\text{Na}_2\text{B}_{12}\text{-A}$ ) carried out by heating from  $RT$  to  $400\text{ }^\circ\text{C}$  ( $\Delta T/\Delta t = 5\text{ }^\circ\text{C}/\text{min}$ ) and isothermal for 24 hours (black line) under  $p(\text{H}_2) = 537\text{ bar}$  (blue line). Large pressure deviations are caused by room temperature fluctuations.

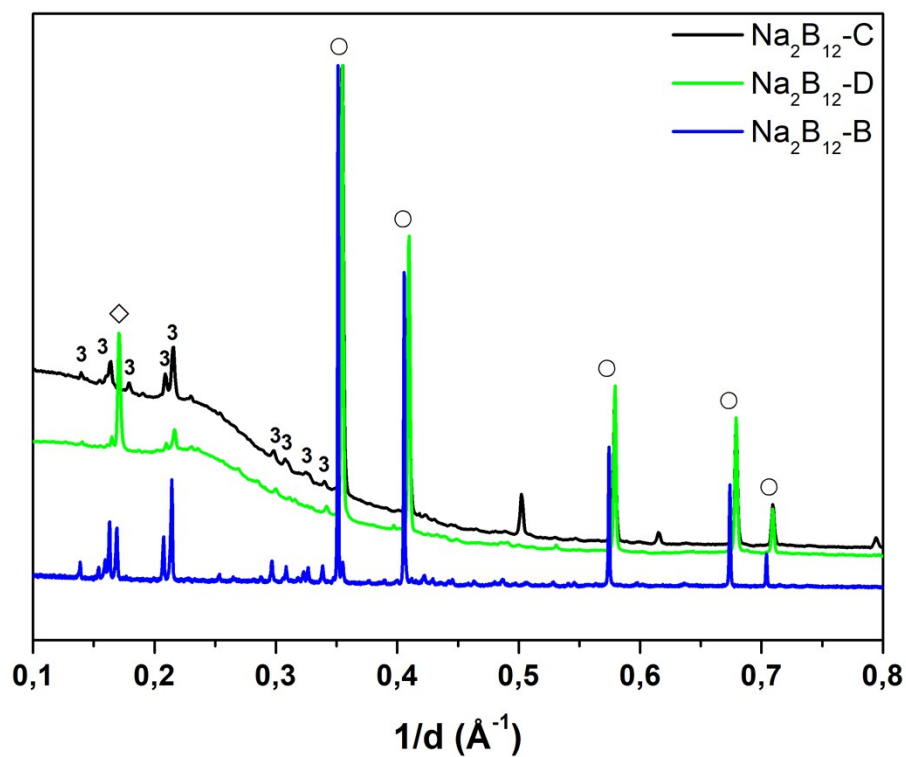

**Figure S12.** Powder X-ray diffraction patterns of Na<sub>2</sub>B<sub>12</sub>-B (bottom blue), Na<sub>2</sub>B<sub>12</sub>-D (middle green) and Na<sub>2</sub>B<sub>12</sub>-C (top black). Na<sub>2</sub>B<sub>12</sub>-B measured with  $\lambda = 1.5418 \text{ \AA}$ , Na<sub>2</sub>B<sub>12</sub>-C and Na<sub>2</sub>B<sub>12</sub>-D measured with  $\lambda = 0.20775 \text{ \AA}$ . Symbols:  $\diamond$  LT-Na<sub>2</sub>B<sub>12</sub>H<sub>12</sub>,  $\blacksquare$  NaH and compound **3**



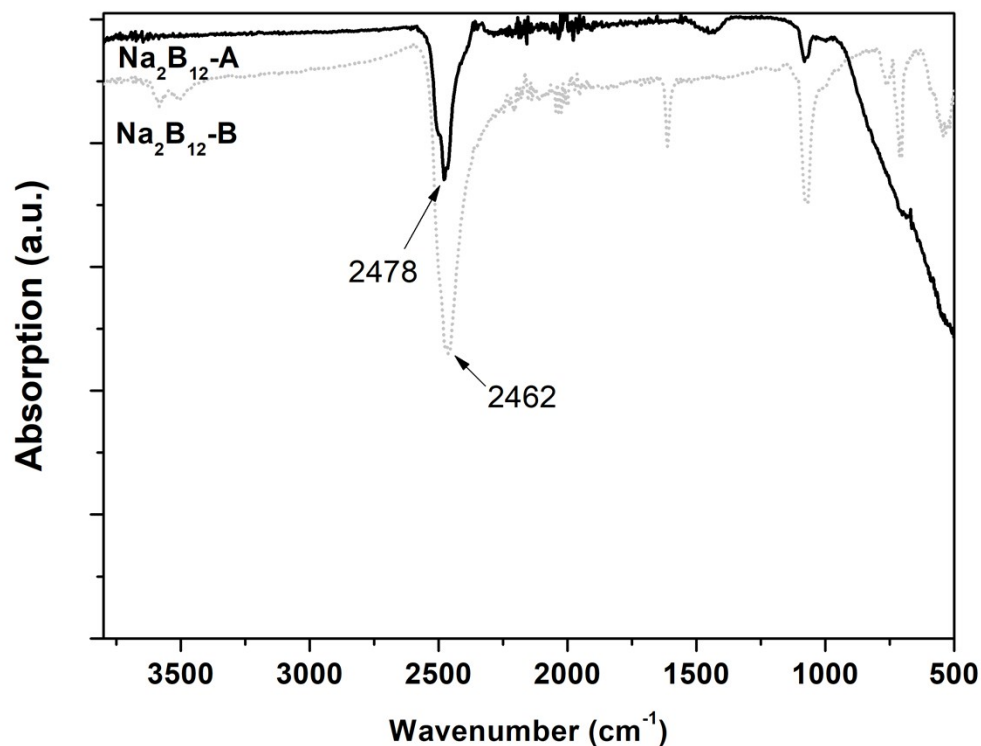

**Figure S13.** FT-IR spectra of  $\text{Na}_2\text{B}_{12}\text{-A}$  (solid black line) and  $\text{Na}_2\text{B}_{12}\text{-B}$  (grey dotted line).

## References

1. F. Klanberg, D. R. Eaton, L. J. Guggenberger and E. L. Muetterties, *Inorg. Chem.*, 1967, **6**, 1271-1281.
2. E. L. Muetterties, E. L. Hoel, C. G. Salentine and M. F. Hawthorne, *Inorg. Chem.*, 1975, **14**, 950-951.
3. E. L. Muetterties, R. J. Wiersema and M. F. Hawthorne, *J. Am. Chem. Soc.*, 1973, **95**, 7520-7522.
4. F. Klanberg and E. L. Muetterties, *Inorg. Chem.*, 1966, **5**, 1955-1960.
5. A. R. Pitochelli, R. Ettinger, J. A. Dupont and M. F. Hawthorne, *J. Am. Chem. Soc.*, 1962, **84**, 1057-1058.
6. S. G. Shore, E. J. M. Hamilton, A. N. Bridges, J. Bausch, J. A. Krause-Bauer, D. Dou, J. Liu, S. Liu, B. Du, H. Hall, E. A. Meyers and K. E. Vermillion, *Inorg. Chem.*, 2003, **42**, 1175-1186.
7. E. I. Tolpin and W. N. Lipscomb, *J. Am. Chem. Soc.*, 1973, **95**, 2384-2386.
8. N. N. Greenwood and J. H. Morr, *Proceedings of the Chemical Society*, 1963, **0**, 338-340.
9. H. Beall and D. F. Gaines, *Inorg. Chim. Acta*, 1999, **289**, 1-10.
10. S. Heřmánek, J. Fusek, B. Štíbr, J. Plešek and T. Jelínek, *Polyhedron*, 1986, **5**, 1873-1879.
11. A. R. Siedle, G. M. Bodner and L. J. Todd, *J. Inorg. Nucl. Chem.*, 1971, **33**, 3671-3676.
12. N. N. Greenwood and B. Youll, *J. Chem. Soc., Dalton Trans.*, 1975, **0**, 158-162.
13. S. Hermanek, *Chem. Rev.*, 1992, **92**, 325-362.
14. T. D. Getman, J. A. Krause, P. M. Niedenzu and S. G. Shore, *Inorg. Chem.*, 1989, **28**, 1507-1510.
15. W. N. Lipscomb, R. J. Wiersema and M. F. Hawthorne, *Inorg. Chem.*, 1972, **11**, 651-652.
16. T. L. Venable, W. C. Hutton and R. N. Grimes, *J. Am. Chem. Soc.*, 1984, **106**, 29-37.
17. R. J. Remmel, H. D. Johnson, I. S. Jaworiwsky and S. G. Shore, *J. Am. Chem. Soc.*, 1975, **97**, 5395-5403.
